# Supplementary material
Source: Springer Nature journal article supplement (https://www.springermedizin.de/resource/supplementary/12967_2008_268_MOESM5_ESM.pdf/9576072)

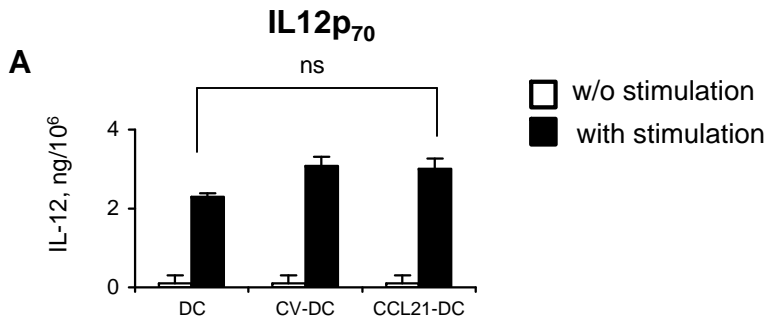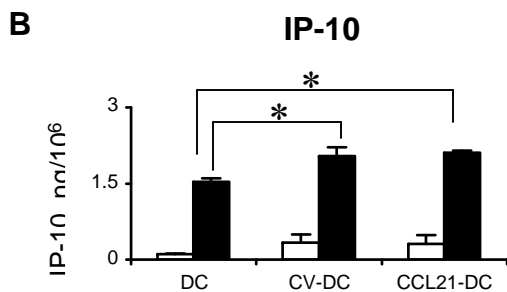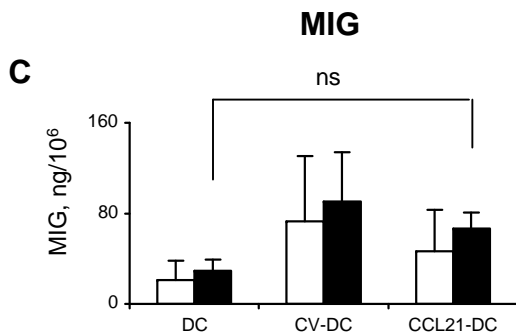

\*  $p \leq 0.01$

Supplement: MOESM5 [file 9576072]
